# Supplementary material for: MEF2 plays a significant role in the tumor inhibitory mechanism of encapsulated RENCA cells via EGF receptor signaling in target tumor cells
Source: Springer Nature journal article supplement (doi:10.1186/s12885-018-5128-5), 2018-12-01

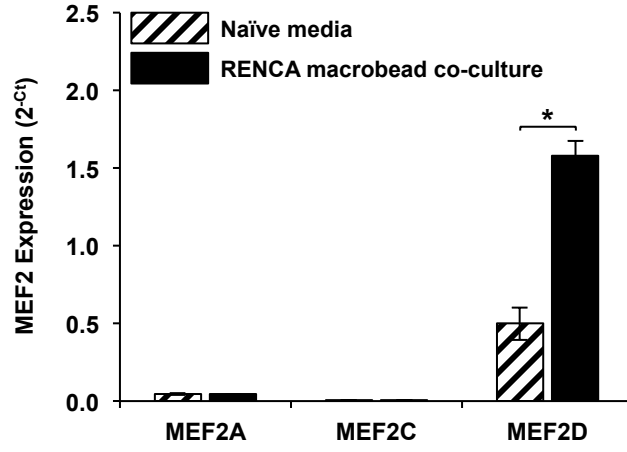

Supplement: MOESM3 [file 16314160]
